# Supplementary material
Source: Royal Society of Chemistry journal article supplement (doi:10.1039/d5lp00399g)
Supplement: d5lp00399g1.pdf [file d5lp00399g1.pdf]

## Supporting Information

### Polyethylene (PE) Vitrimer by Cross-linking Two Mass-produced Ethylene-based Polymers through One-step Reactive Blending

Xuanwei Zhang<sup>a</sup>, Siyu Guo<sup>a</sup>, Xiaopei Li<sup>b</sup>, Yongjie Zhang<sup>\*a</sup>

<sup>a</sup> School of Textile and Material Engineering, Dalian Polytechnic University, Dalian 116034, China

<sup>b</sup> Instrumental Analysis Centre, Dalian Polytechnic University, Dalian 116034, China

\*Corresponding Author: Yongjie Zhang (yjzhang@dlpu.edu.cn)

**Table S1** Gel fraction and ester conversion of PE vitrimers

| Sample | EVA<br>(g) | TMS-PE<br>(g) | TT-01<br>(g) | Gel fraction<br>(wt%) | Conversion<br>(%, C=O) |
|--------|------------|---------------|--------------|-----------------------|------------------------|
| Si60   | 25.00      | 15.00         | 0.30         | 37.7                  | 13.9                   |
| Si90   | 21.05      | 18.95         | 0.38         | 51.2                  | 19.2                   |
| Si120  | 18.18      | 21.82         | 0.44         | 60.9                  | 27.6                   |

**Table S2** Thermal properties of raw materials and PE vitrimers

| Sample | $T_{c, \text{EVA}}^a$<br>(°C) | $T_{c, \text{TMS-PE}}^b$<br>(°C) | $\Delta H_{c, \text{EVA}}^a$<br>(J/g) | $\Delta H_{c, \text{TMS-PE}}^b$<br>(J/g) |
|--------|-------------------------------|----------------------------------|---------------------------------------|------------------------------------------|
| EVA    | 52.45                         | \                                | 28.48                                 | \                                        |
| TMS-PE | \                             | 114.25                           | \                                     | 55.85                                    |
| Si60   | 54.57                         | 100.51                           | 25.90                                 | 52.35                                    |
| Si90   | 50.31                         | 100.69                           | 24.47                                 | 52.51                                    |
| Si120  | 45.34                         | 100.11                           | 18.03                                 | 50.88                                    |

<sup>a</sup> Normalized to EVA for PE vitrimers

<sup>b</sup> Normalized to TMS-PE for PE vitrimers

**Table S3** Storage modulus and molecular weight between cross-links of self-cross-linked TMS-PE and PE vitrimers

| Sample                   | $E'$ (MPa) <sup>a</sup> | $M_c$ (g/mol) <sup>b</sup> |
|--------------------------|-------------------------|----------------------------|
| self-cross-linked TMS-PE | 0.68                    | 13185                      |
| Si60                     | 0.33                    | 27759                      |
| Si90                     | 0.68                    | 13471                      |
| Si120                    | 0.97                    | 9444                       |

<sup>a</sup>  $E'$  represents the storage modulus at 407 K; <sup>b</sup>  $M_c$  represents the molecular weight between cross-links, according to Equation S2 (vide infra).

**Table S4** Mechanical properties of ethylene-based commodity polymers

| Sample                          | Manufacturer                     | Designation                           | Elongation<br>at break <sup>a</sup><br>(%) | Tensile<br>strength <sup>b</sup><br>(MPa) |
|---------------------------------|----------------------------------|---------------------------------------|--------------------------------------------|-------------------------------------------|
| LDPE                            | Dow Chemical                     | 1000                                  | 390                                        | 12                                        |
|                                 | Total Energies                   | 1022FH24                              | 350                                        | 12                                        |
|                                 | Nexus Resin                      | 1017                                  | 300                                        | 9                                         |
|                                 | Nexus Resin                      | 818                                   | 400                                        | 10                                        |
|                                 | Sinopec Yanshan<br>Petrochemical | 1I50A                                 | 320                                        | 8                                         |
|                                 | LLDPE                            | Sinopec<br>Zhongyuan<br>Petrochemical | DFDC-7050                                  | 500                                       |
| Sinopec Yangzi<br>Petrochemical |                                  | DFDA-7042                             | 750                                        | 8                                         |
| Shanghai Secco<br>Petrochemical |                                  | LL0220KJ                              | 600                                        | 10                                        |
| Shanghai Secco                  |                                  | LL0209KJ                              | 620                                        | 10                                        |

|     |                  |         |      |      |
|-----|------------------|---------|------|------|
|     | Petrochemical    |         |      |      |
|     | SABIC            | M200024 | 450  | 12   |
| EVA | Dow Chemical     | 40L     | 930  | 7.3  |
|     | Jiangsu Sierbang | UE2825  | 1610 | 9.0  |
|     | Petrochemical    |         |      |      |
|     | Arkema           | 2803    | 930  | 18.5 |
|     | Dupont           | 460     | 540  | 10.4 |
|     | BASF-YPC         | V5100J  | 750  | 22.5 |

Data collected according to the China Plastic Online website and the China Material Properties Query website

**Table S5** Ester conversion of Si90 before and after reprocessing

| Sample              | Conversion (% C=O) |
|---------------------|--------------------|
| Si90                | 19.2               |
| Si90 <sub>1st</sub> | 19.4               |
| Si90 <sub>2nd</sub> | 19.3               |

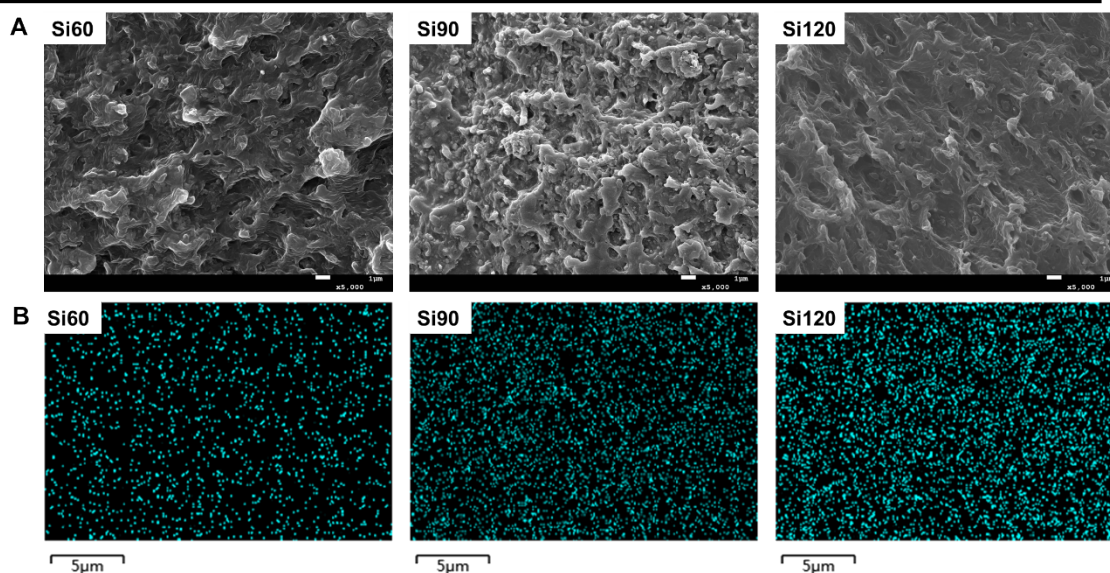

**Figure S1** (A) SEM micrographs of PE vitrimers (Scale bar: 1  $\mu\text{m}$ ) and (B) silicon element mapping images of PE vitrimers (Scale bar: 5  $\mu\text{m}$ )

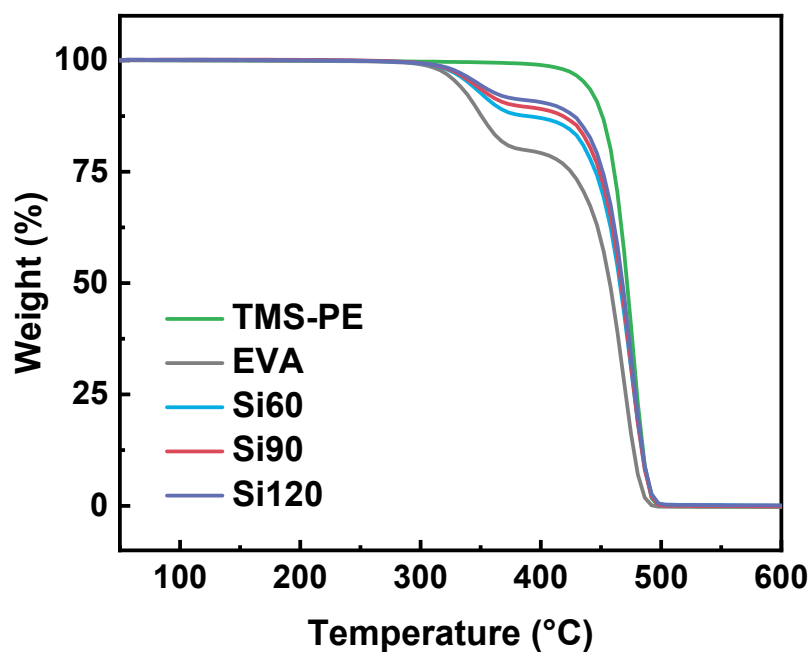

Figure S2 TGA curves of raw materials and PE vitrimers (N<sub>2</sub>, 10 °C/min)

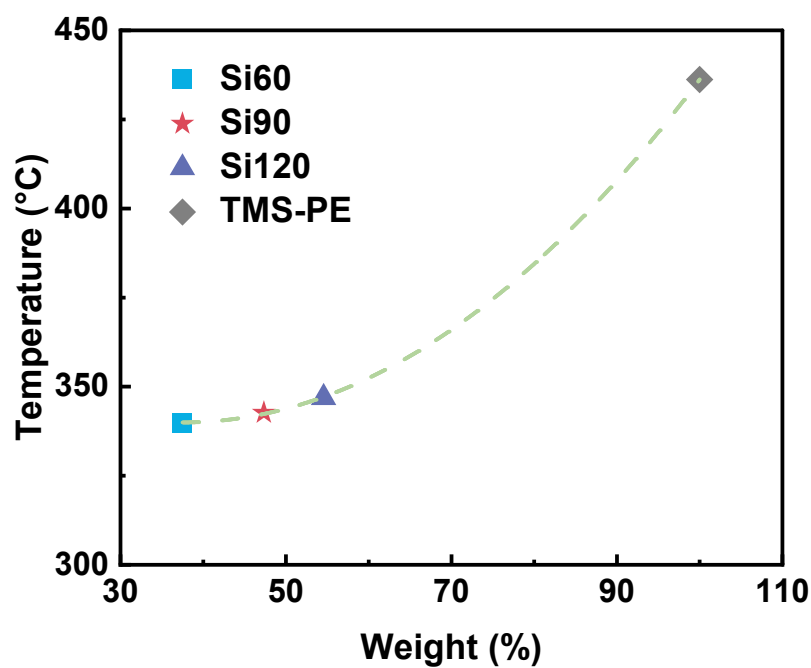

Figure S3 Initial decomposition temperature as a function of TMS-PE content

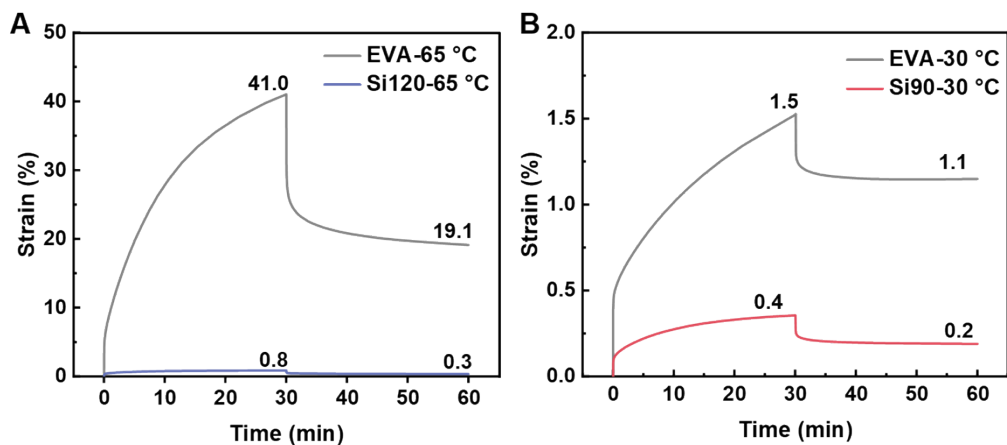

**Figure S4** Creep curves of (A) EVA and Si120 measured at 65 °C and (B) EVA and Si90 measured at 30 °C

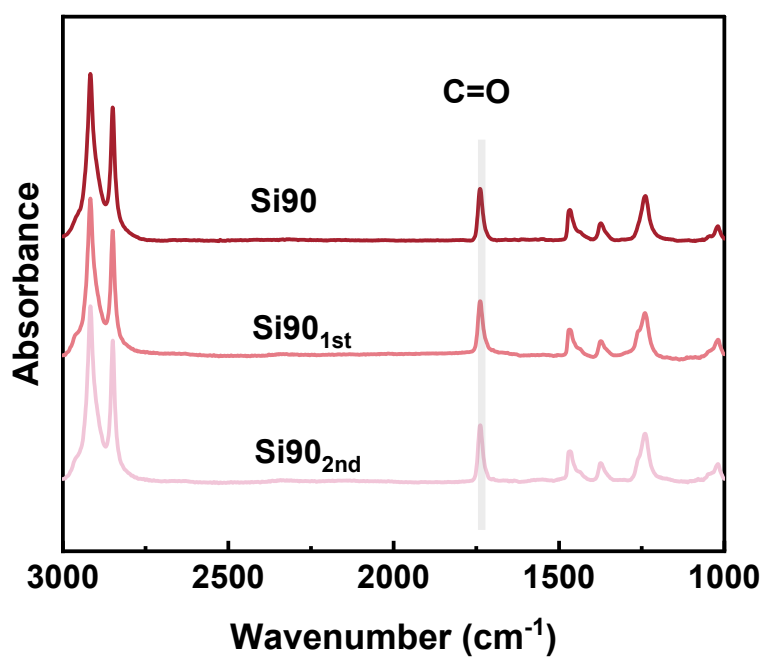

**Figure S5** FTIR spectra of Si90 before and after reprocessing cycles

## Calculations

### Determination of conversions

The calculation process of the ester group conversion for PE vitrimers is as follows.

$$Con.\% = \left[ 1 - \frac{A_{1740, vitrimer}/A_{2920 + 2850, vitrimer} * EVA\ wt\%}{A_{1740, linear}/A_{2920 + 2850, linear}} \right] \times \%$$

(Equation S1)

Where:

$A_{1740, vitrimer}$  represents the integrated area of peak at 1740  $cm^{-1}$  for PE vitrimer;

$A_{1740, linear}$  represents the integrated area of peak at 1740  $cm^{-1}$  for EVA;

$A_{2920+2850, vitrimer}$  represents the integrated area of peaks at 2920  $cm^{-1}$  and 2850  $cm^{-1}$  for PE vitrimer;

$A_{2920+2850, linear}$  represents the integrated area of peaks at 2920  $cm^{-1}$  and 2850  $cm^{-1}$  for EVA.

### Determination of $M_c$

The molecular weight between cross-links ( $M_c$ ) refers to the average molecular weight of the polymer chain segments between two adjacent cross-linking points. Calculation of  $M_c$  can be performed using the Equation:

$$M_c = 2(1 + \nu) \frac{\rho RT}{E'} \quad (\text{Equation S2})$$

Where:

$\nu$  = Poisson's ratio (0.44)

$\rho$  = density (0.94  $g/cm^3$  or 940  $kg/m^3$ )

R = universal gas constant (8.314  $m^3 \cdot Pa/K \cdot mol$ )

T = temperature (407 K)

$E'$  = storage modulus (0.33 MPa at 407 K)

The  $M_c$  values for Si60, Si90, and Si120 networks at 407K were calculated to be 27.7,

13.5, and 9.4 kg/mol, respectively.
